# Supplementary material for: Sm/Co Magnetic Materials: A Recycling Strategy Using Modifiable Hydrophobic Deep Eutectic Solvents Based on Trioctylphosphine Oxide
Source: MDPI journal article supplement (doi:10.3390/ijms241814032), 2023-09-13
Supplement: s1 [file s1]

## Supplementary materials

# Sm/Co Magnetic Materials: A Recycling Strategy Using Modifiable Hydrophobic Deep Eutectic Solvents Based on Trioctylphosphine Oxide

Nikita A. Milevskii, Inna V. Zinov'eva, Arina V. Kozhevnikova, Yulia A. Zakhodyaeva \*  
and Andrey A. Voshkin

Kurnakov Institute of General and Inorganic Chemistry, Russian Academy of Sciences, Leninsky Prospekt 31, 119991 Moscow, Russia; mna@igic.ras.ru (N.A.M.); iz@igic.ras.ru (I.V.Z.); ak@igic.ras.ru (A.V.K.); voshkin@igic.ras.ru (A.A.V.)

\* Correspondence: yz@igic.ras.ru; Tel.: +7-495-9542442

**Table S1.** Materials

| Compound                                             | Supplier | CAS        | Purity, wt% * |
|------------------------------------------------------|----------|------------|---------------|
| Trioctylphosphine oxide                              | Acros    | 78-50-2    | 98%           |
| Thymol                                               | Acros    | 89-83-8    | 99%           |
| Phenol                                               | Chimmed  | 108-95-2   | 99%           |
| p-tert-Butylphenol                                   | Chimmed  | 98-54-4    | 99%           |
| HNO <sub>3</sub>                                     | Chimmed  | 7697-37-2  | —             |
| Sm(NO <sub>3</sub> ) <sub>3</sub> ·6H <sub>2</sub> O | Chimmed  | 13759-83-6 | 99%           |
| Co(NO <sub>3</sub> ) <sub>2</sub> ·6H <sub>2</sub> O | Chimmed  | 10026-22-9 | 99%           |
| NaNO <sub>3</sub>                                    | Chimmed  | 7631-99-4  | 99%           |

\*Declared by suppliers.

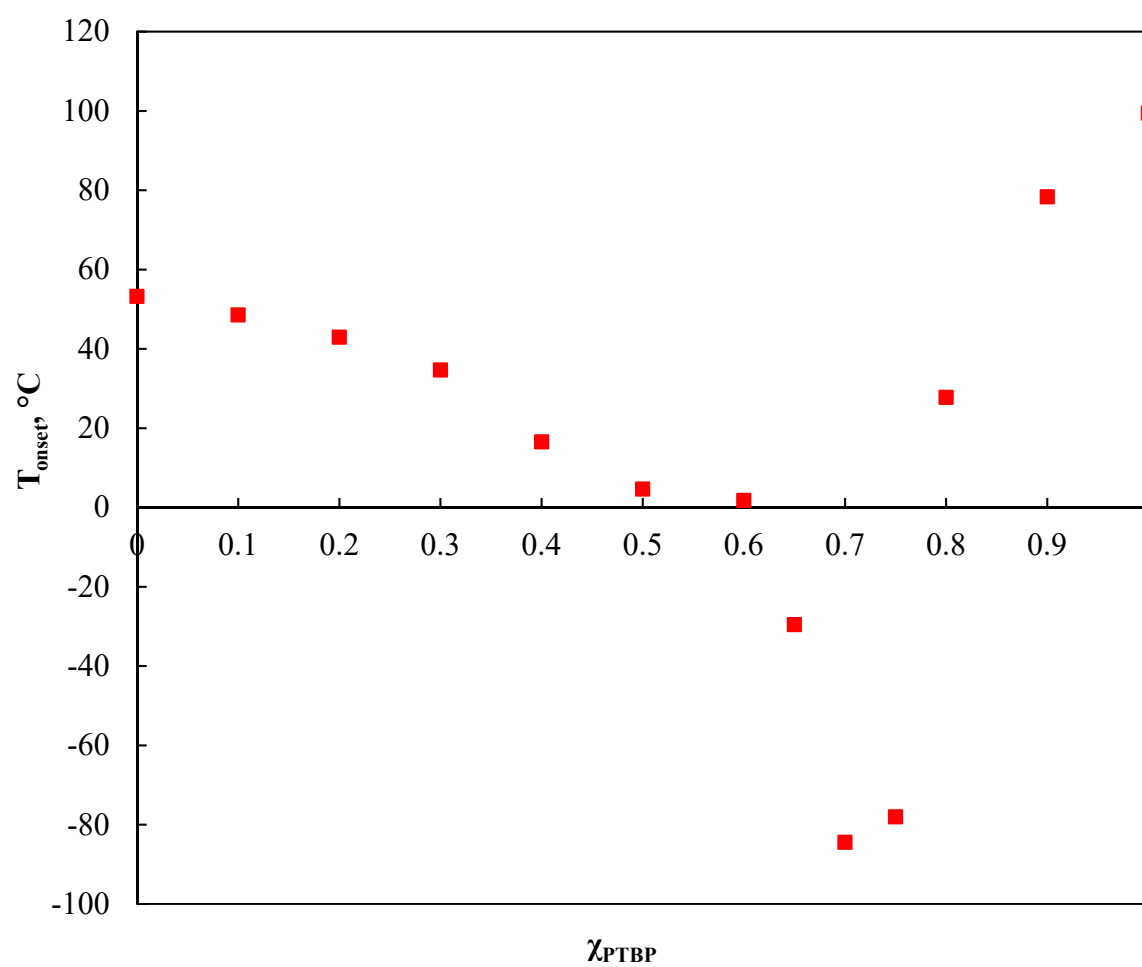

**Figure S1.** Phase diagram for PTBP:TOPO mixture, constructed from DSC results.



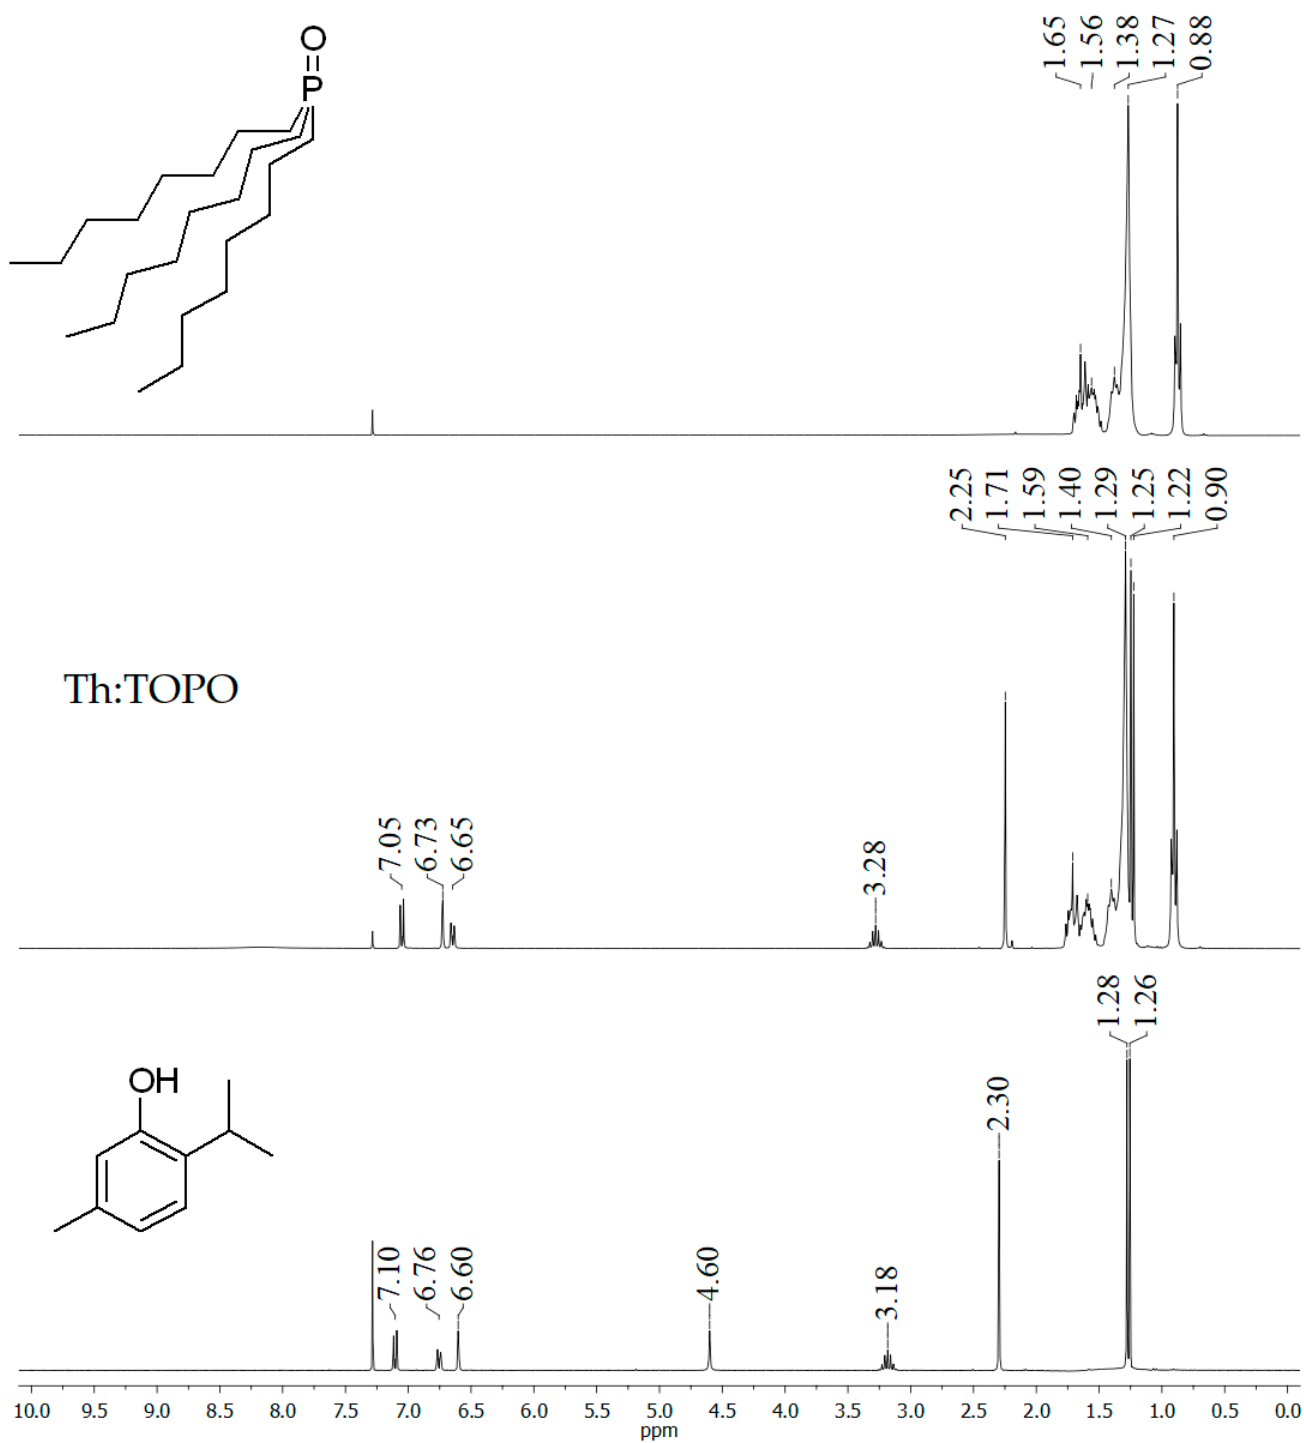

**Figure S3.** Proton NMR of Th:TOPO HDES.

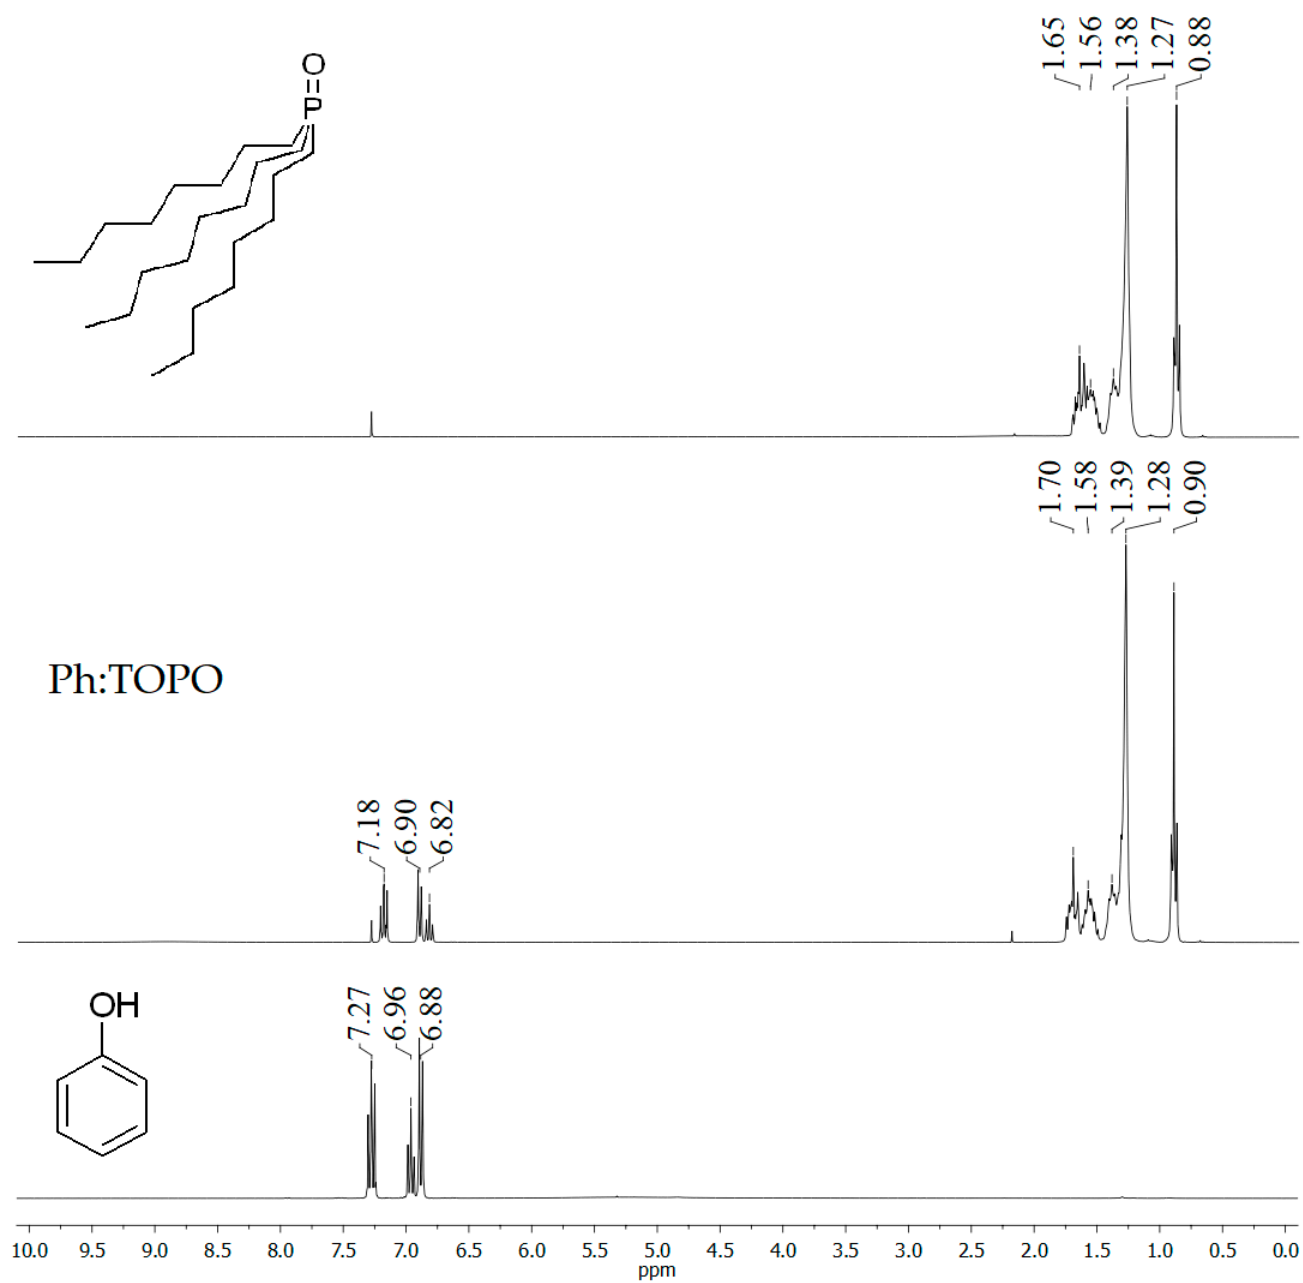

**Figure S4.** Proton NMR of Ph:TOPO HDES.

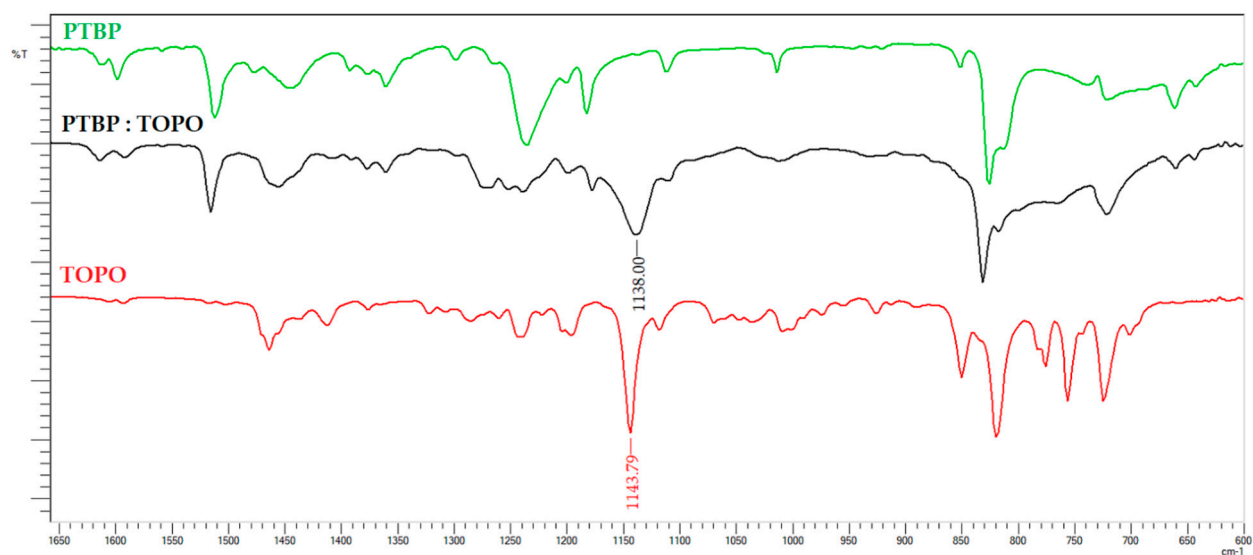

**Figure S5.** FTIR spectra of PTBP:TOPO HDES.

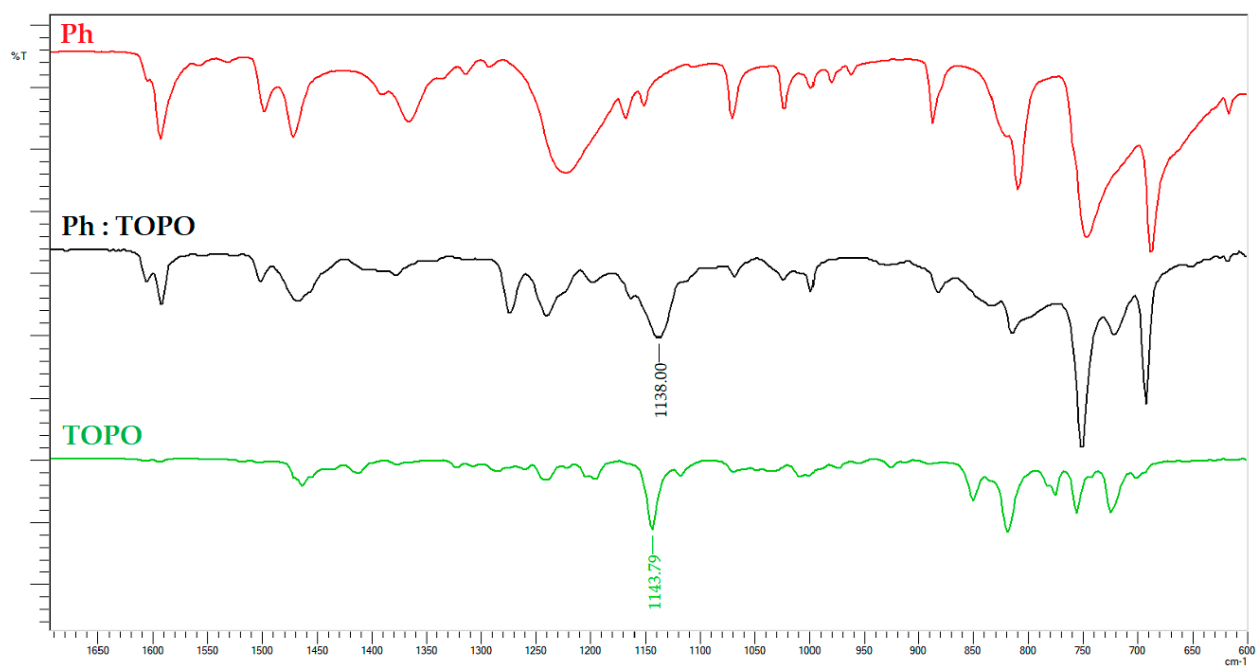

**Figure S6.** FTIR spectra of Ph:TOPO HDES.

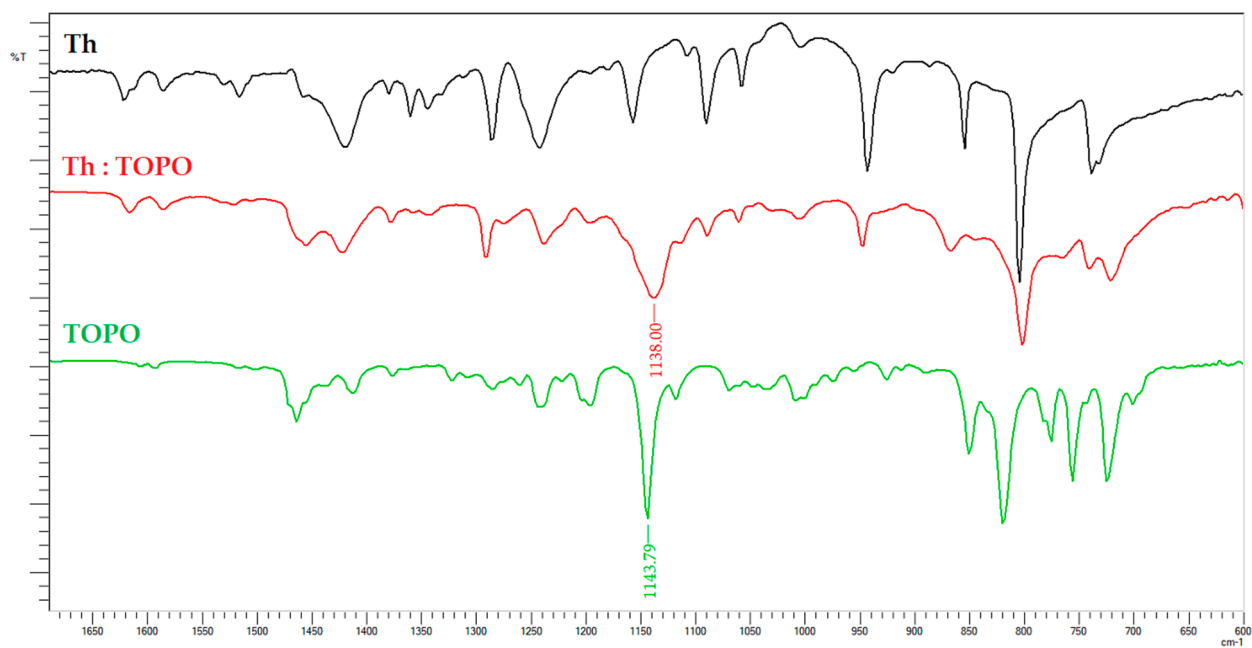

**Figure S7.** FTIR spectra of Th:TOPO HDES.

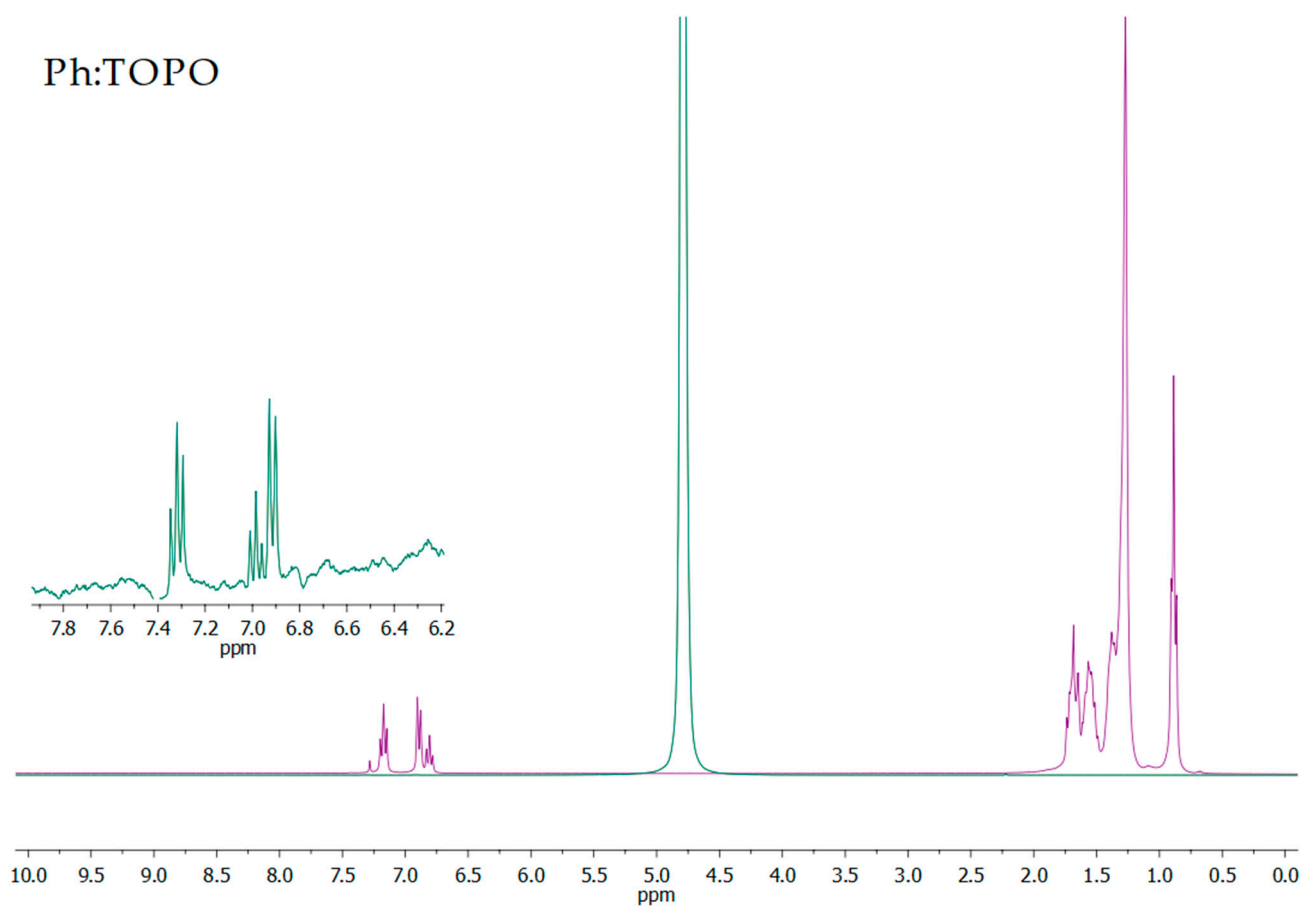

**Figure S8.** <sup>1</sup>H NMR spectra of the aqueous (green line) and HDES Ph:TOPO phases (purple line) after stirring.

PTBP:TOPO

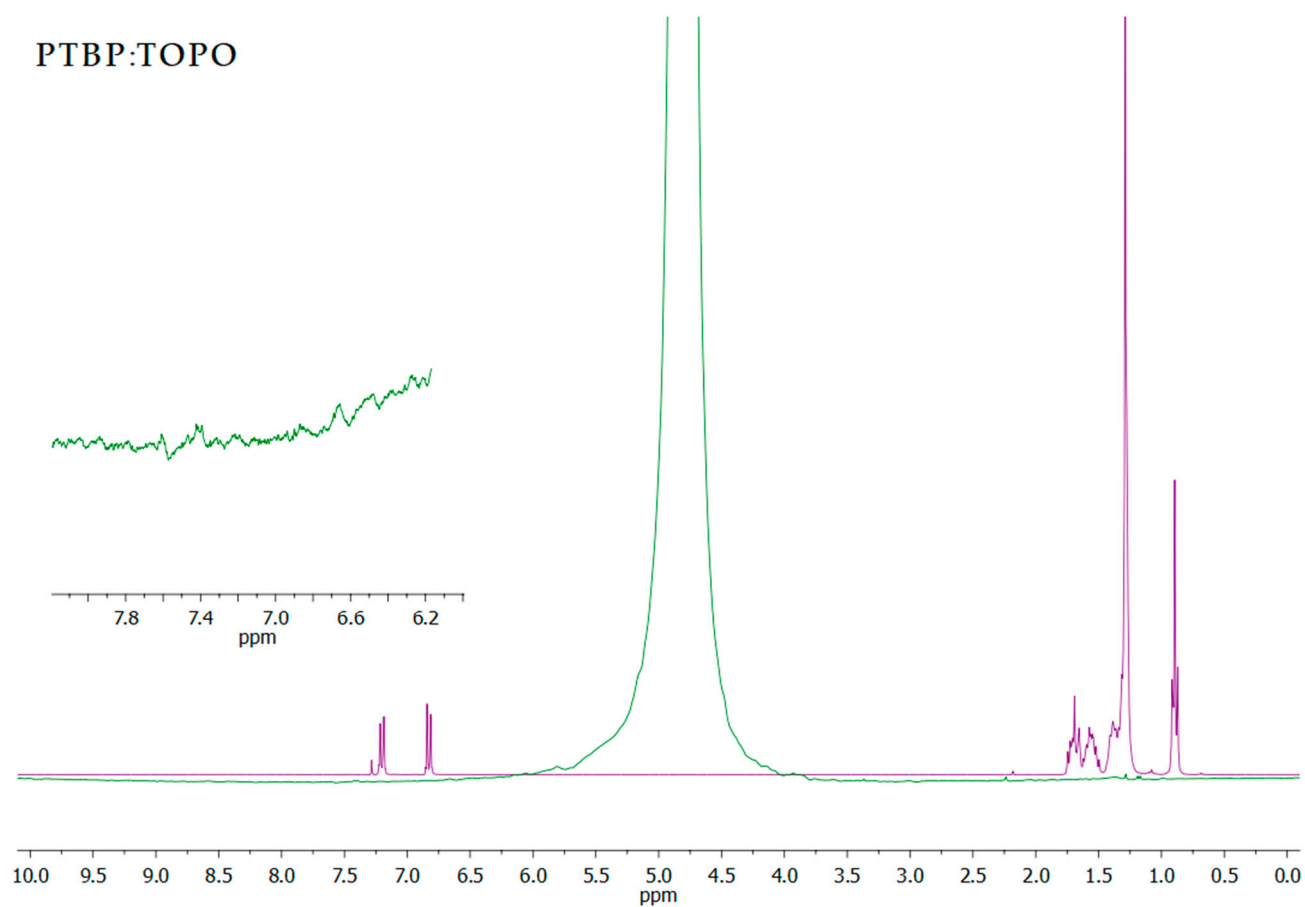

**Figure S9.**  $^1\text{H}$  NMR spectra of the aqueous (green line) and HDES PTBP:TOPO phases (purple line) after stirring.



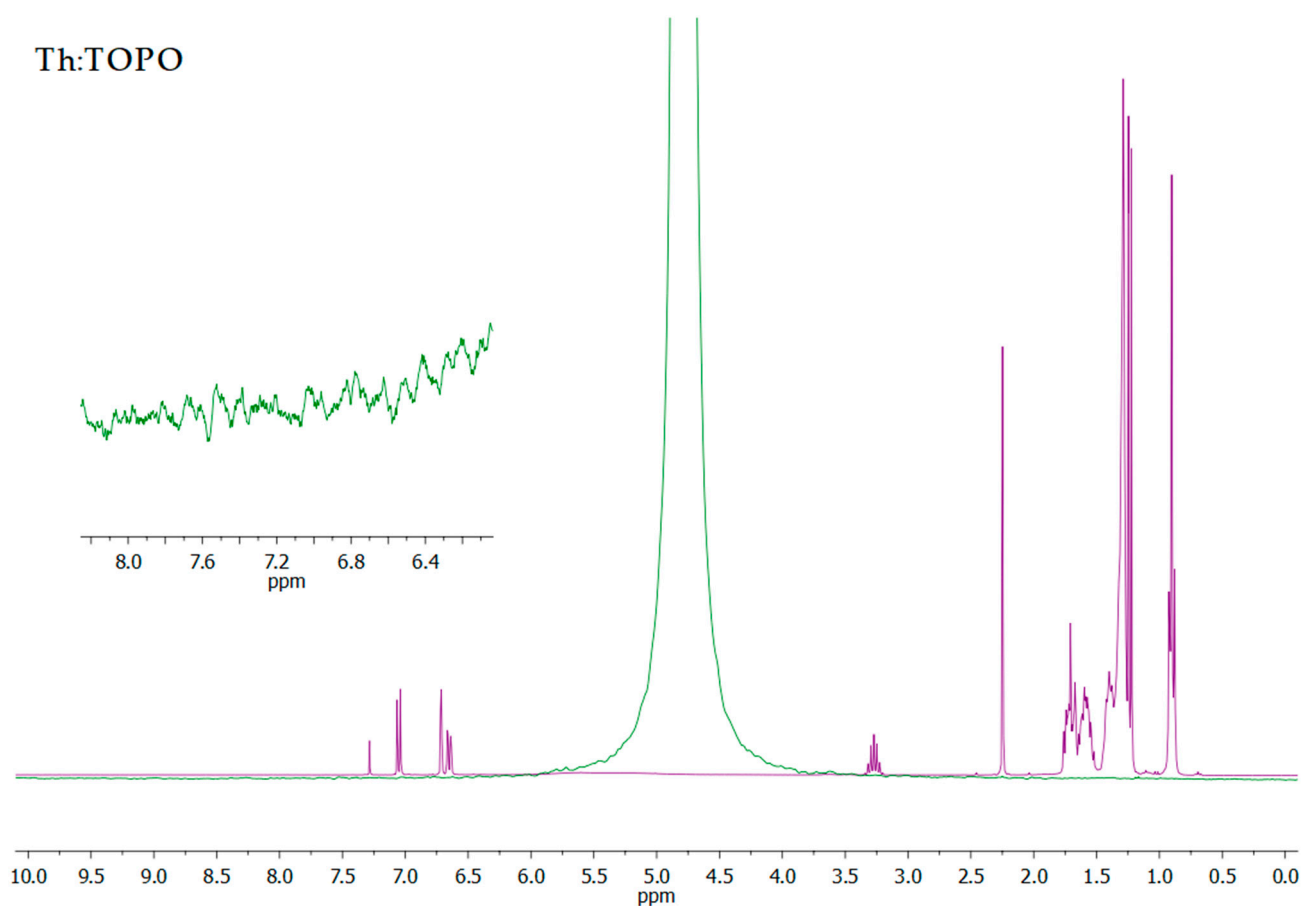

**Figure S10.**  $^1\text{H}$  NMR spectra of the aqueous (green line) and HDES Th:TOPO phases (purple line) after stirring.

### *Computational study*

Theoretical calculations: optimization of all molecular geometries, NBO (natural bond orbital) charges, supramolecular complexes energies were performed using Gaussian16 [1] software package at PBE-D3(BJ)/def2-TZVP level of theory. PBE [2] functional and Weigend def2-TZVP [3] basis set has recommended itself as a highly accurate method for modelling small organic molecules [4, 5]. Grimme's D3 dispersion correction with Becke–Johnson damping has been used to better estimation of non-covalent interactions [6]. BSSE correction energies computed using the counterpoise scheme [7]. Tight optimization criteria and ultrafine grids were used in each calculation.

### References

- [1] Frisch, M.; Trucks, G.; Schlegel, H.; Scuseria, G.; Robb, M.; Cheeseman, J.; Scalmani, G.; Barone, V.; Petersson, G.; Nakatsuji, H. et al.; Gaussian 09, Revision C.01; Gaussian, Inc.: Wallingford CT, 2016.
- [2] J. P. Perdew, K. Burke and M. Ernzerhof, *Phys. Rev. Lett.*, 1996, 77, 3865–3868.
- [3] F. Weigend and R. Ahlrichs, *Phys. Chem. Chem. Phys.*, 2005, 7, 3297–3305.
- [4] M. G. Medvedev, I. S. Bushmarinov, J. Sun, J. P. Perdew and K. A. Lyssenko, *Science*, 2017, 355, 49–52.
- [5] N. Mardirossian and M. Head-Gordon, *Molecular Physics*, 2017, 115, 2315–2372.
- [6] S. Grimme, J. Antony, S. Ehrlich and H. Krieg, *J. Chem. Phys.*, 2010, 132, 154104.
- [7] S. F. Boys and F. Bernardi, *Molecular Physics*, 1970, 19, 553–566.
